# Supplementary material
Source: PubMed Central journal article supplement (PMC4417177)
Supplement: supp_gkv271_nar-00673-d-2015-File006.pdf [file supp_gkv271_nar-00673-d-2015-File006.pdf]

| Len. (bp) | Homopolymer classes |         | Dinucleotide repeat classes |       |       |       | Trinucleotide repeat classes |       |       |       |      |      |      |      |      |      |  |
|-----------|---------------------|---------|-----------------------------|-------|-------|-------|------------------------------|-------|-------|-------|------|------|------|------|------|------|--|
|           | 101                 | 102     | 201                         | 202   | 203   | 204   | 301                          | 302   | 303   | 304   | 305  | 306  | 307  | 308  | 309  | 310  |  |
| 1         | 3200535             | 2909952 |                             |       |       |       |                              |       |       |       |      |      |      |      |      |      |  |
| 2         | 1082377             | 644594  |                             |       |       |       |                              |       |       |       |      |      |      |      |      |      |  |
| 3         | 377969              | 110227  |                             |       |       |       |                              |       |       |       |      |      |      |      |      |      |  |
| 4         | 138707              | 19708   | 82509                       | 82741 | 98187 | 15849 |                              |       |       |       |      |      |      |      |      |      |  |
| 5         | 49191               | 3571    | 24561                       | 20063 | 29223 | 2367  |                              |       |       |       |      |      |      |      |      |      |  |
| 6         | 16408               | 648     | 7806                        | 4115  | 6277  | 453   | 24909                        | 24760 | 17143 | 16907 | 9371 | 8971 | 8454 | 7220 | 4467 | 2745 |  |
| 7         | 6918                | 143     | 2584                        | 1197  | 1741  | 90    | 7837                         | 8215  | 5598  | 5103  | 2789 | 2864 | 2774 | 2006 | 1180 | 798  |  |
| 8         | 2668                | 23      | 918                         | 246   | 399   | 23    | 2654                         | 3474  | 2094  | 1876  | 904  | 896  | 1006 | 691  | 465  | 146  |  |
| 9         | 1290                | 13      | 400                         | 127   | 147   | 13    | 983                          | 1192  | 775   | 662   | 217  | 256  | 251  | 176  | 90   | 41   |  |
| 10        | 788                 | 6       | 164                         | 31    | 34    | 4     | 344                          | 441   | 261   | 212   | 76   | 155  | 120  | 70   | 33   | 10   |  |
| 11        | 489                 | 4       | 93                          | 23    | 16    | 1     | 144                          | 285   | 146   | 128   | 22   | 48   | 99   | 37   | 28   | 6    |  |
| 12        | 343                 | 0       | 55                          | 7     | 1     | 0     | 60                           | 93    | 51    | 45    | 12   | 15   | 30   | 12   | 12   | 1    |  |
| 13        | 246                 | 0       | 56                          | 14    | 1     | 0     | 47                           | 36    | 19    | 22    | 2    | 13   | 11   | 8    | 1    | 0    |  |
| 14        | 124                 | 2       | 32                          | 3     | 2     | 0     | 25                           | 38    | 19    | 24    | 3    | 6    | 14   | 5    | 7    | 0    |  |
| 15        | 93                  | 0       | 32                          | 6     | 3     | 0     | 8                            | 22    | 6     | 9     | 3    | 2    | 9    | 2    | 1    | 0    |  |
| 16        | 63                  | 1       | 20                          | 2     | 1     | 0     | 13                           | 12    | 9     | 10    | 0    | 0    | 7    | 2    | 3    | 0    |  |
| 17        | 51                  | 0       | 21                          | 5     | 2     | 0     | 7                            | 11    | 8     | 20    | 0    | 1    | 13   | 3    | 1    | 0    |  |
| 18        | 28                  | 0       | 23                          | 2     | 0     | 0     | 6                            | 9     | 4     | 5     | 1    | 0    | 2    | 1    | 0    | 0    |  |
| 19        | 33                  | 1       | 12                          | 1     | 0     | 0     | 3                            | 2     | 1     | 3     | 0    | 0    | 1    | 0    | 1    | 0    |  |
| 20        | 22                  | 0       | 18                          | 1     | 0     | 0     | 4                            | 7     | 6     | 10    | 0    | 1    | 4    | 1    | 2    | 0    |  |
| 21        | 15                  | 0       | 14                          | 1     | 4     | 0     | 4                            | 1     | 2     | 5     | 1    | 1    | 0    | 0    | 1    | 0    |  |
| 22        | 18                  | 0       | 14                          | 2     | 0     | 0     | 1                            | 2     | 1     | 0     | 0    | 0    | 0    | 0    | 0    | 0    |  |
| 23        | 13                  | 0       | 16                          | 1     | 0     | 0     | 5                            | 3     | 1     | 3     | 1    | 0    | 4    | 1    | 0    | 0    |  |
| 24        | 18                  | 0       | 12                          | 0     | 0     | 0     | 3                            | 3     | 3     | 0     | 1    | 1    | 4    | 0    | 1    | 0    |  |
| 25        | 9                   | 0       | 3                           | 1     | 0     | 0     | 2                            | 2     | 0     | 1     | 0    | 0    | 1    | 0    | 1    | 0    |  |
| 26        | 9                   | 0       | 8                           | 2     | 0     | 0     | 1                            | 1     | 1     | 5     | 0    | 0    | 3    | 1    | 0    | 0    |  |
| 27        | 5                   | 0       | 9                           | 1     | 0     | 0     | 1                            | 5     | 2     | 3     | 0    | 0    | 1    | 0    | 0    | 0    |  |
| 28        | 4                   | 0       | 2                           | 0     | 0     | 0     | 1                            | 1     | 1     | 3     | 0    | 0    | 0    | 0    | 0    | 0    |  |
| 29        | 4                   | 0       | 5                           | 0     | 0     | 0     | 3                            | 0     | 0     | 1     | 0    | 0    | 1    | 0    | 0    | 0    |  |
| 30        | 1                   | 0       | 6                           | 0     | 0     | 0     | 2                            | 0     | 2     | 0     | 1    | 0    | 0    | 0    | 0    | 0    |  |
| 31        | 4                   | 0       | 2                           | 0     | 0     | 0     | 1                            | 2     | 1     | 0     | 1    | 0    | 0    | 0    | 0    | 0    |  |
| 32        | 1                   | 0       | 7                           | 0     | 0     | 0     | 0                            | 1     | 0     | 0     | 0    | 0    | 1    | 0    | 0    | 0    |  |
| 33        | 1                   | 0       | 0                           | 0     | 0     | 0     | 0                            | 1     | 0     | 0     | 0    | 0    | 0    | 0    | 0    | 0    |  |
| 34        | 1                   | 0       | 1                           | 1     | 0     | 0     | 1                            | 0     | 1     | 0     | 0    | 0    | 0    | 0    | 0    | 0    |  |
| 35        | 2                   | 0       | 2                           | 1     | 0     | 0     | 2                            | 0     | 0     | 1     | 0    | 0    | 0    | 0    | 0    | 0    |  |
| 36        | 1                   | 0       | 3                           | 0     | 0     | 0     | 0                            | 0     | 1     | 0     | 0    | 0    | 0    | 0    | 0    | 0    |  |
| 37        | 1                   | 0       | 1                           | 0     | 0     | 0     | 1                            | 0     | 0     | 0     | 0    | 0    | 0    | 0    | 0    | 0    |  |
| 38        | 0                   | 0       | 1                           | 0     | 0     | 0     | 1                            | 0     | 0     | 0     | 0    | 0    | 0    | 0    | 0    | 0    |  |
| 39        | 0                   | 0       | 1                           | 1     | 0     | 0     | 0                            | 1     | 0     | 1     | 0    | 0    | 0    | 0    | 0    | 0    |  |
| 40        | 0                   | 0       | 1                           | 0     | 0     | 0     | 1                            | 0     | 0     | 0     | 0    | 0    | 0    | 0    | 0    | 0    |  |
| >40       | 1                   | 0       | 1                           | 2     | 1     | 0     | 7                            | 1     | 1     | 3     | 0    | 0    | 1    | 0    | 2    | 0    |  |

**Table S1. Number of repeats of various classes in the yeast genome. "Len." = length of repeat tract.**

| Class | Type      | Reference | Mutation | Chrom. | Position | 5'-Flank    | 3'-Flank    | Feature | Data Set (all mmmr-)     |
|-------|-----------|-----------|----------|--------|----------|-------------|-------------|---------|--------------------------|
| 101a  | Deletion  | AAAA      | ----     | 5      | 267229   | GATCATCGAG  | AAAAAAAAAAA |         | <i>pol2-M644G</i> TAK217 |
| 101a  | Deletion  | AAAA      | ----     | 12     | 723078   | AACGAAAAAC  | AAAAAAAAAAA |         | <i>pol2-M644G</i> TAK206 |
| 101a  | Deletion  | TTTT      | ----     | 15     | 214947   | CATTCTAGTA  | TTTTTTTTTT  |         | <i>pol2-M644G</i> TAK180 |
| 102   | Deletion  | CC        | --       | 4      | 411724   | ATATTGTACA  | CCCCCCCCCT  |         | <i>pol2-M644G</i> TAK206 |
| 102   | Deletion  | CCCC      | ----     | 15     | 94816    | CAACGAAATA  | CCCCCCCCCT  |         | <i>pol2-M644G</i> TAK217 |
| 102   | Deletion  | CCCC      | ----     | 15     | 94816    | CAACGAAATA  | CCCCCCCCCT  |         | <i>pol1-L868M</i> TAK269 |
| 102   | Deletion  | GGGGGG    | -----    | 5      | 544032   | AGGGGAAAAA  | GGGGGGGGGG  |         | <i>WT pols</i> TAK258    |
| 201b  | Deletion  | ATATATAT  | -----    | 2      | 133861   | TCTTGGTCAC  | ATATATATAT  |         | <i>pol2-M644G</i> TAK206 |
| 202b  | Deletion  | CACA      | ----     | 10     | 701336   | CCAATACAAT  | CACACACACA  |         | <i>pol2-M644G</i> TAK068 |
| 202b  | Deletion  | ACAC      | ----     | 1      | 17291    | ACCGTTTTTA  | ACACACACCA  |         | <i>WT pols</i> TAK258    |
| 202b  | Deletion  | ACAC      | ----     | 1      | 17291    | ACCGTTTTTA  | ACACACACCA  |         | <i>WT pols</i> TAK260    |
| 202b  | Deletion  | ACAC      | ----     | 1      | 17291    | ACCGTTTTTA  | ACACACACCA  |         | <i>WT pols</i> TAK266    |
| 301   | Deletion  | TAA       | ---      | 10     | 469784   | GCAATAATAG  | TAATAATAAT  |         | <i>WT pols</i> TAK266    |
| 303   | Deletion  | TCA       | ---      | 3      | 267305   | GTCTCAGTTT  | TCATCATCAT  | FIG2    | <i>WT pols</i> TAK258    |
| 304   | Deletion  | GTT       | ---      | 1      | 112763   | TTCACCGCC   | GTTGTTGTTG  | CCR4    | <i>WT pols</i> TAK258    |
| N/A   | Deletion  | AT        | --       | 4      | 1054665  | AAAAAAAAAAA | TTTTGTAC    |         | <i>pol2-M644G</i> TAK217 |
| N/A   | Deletion  | CTAG      | ----     | 4      | 233743   | TGTCATGTCT  | CTATGTATAT  | VCX1    | <i>pol2-M644G</i> TAK206 |
| 101   | Insertion | --        | TT       | 2      | 71821    | AATAATTTTC  | TTTTTTTTTT  |         | <i>pol1-L868M</i> TAK269 |
| 101   | Insertion | --        | TT       | 3      | 6292     | TTTTGCTTTC  | TTTTTTTTTT  |         | <i>WT pols</i> TAK259    |
| 101   | Insertion | ---       | TTT      | 9      | 142349   | ACTTCATCAA  | TTTTTTTTTT  |         | <i>pol2-M644G</i> TAK068 |
| 101   | Insertion | --        | TT       | 9      | 355450   | TGTTGAAGTG  | TTTTTTTTGG  | SGN1    | <i>pol3-L612M</i> TAK281 |
| 101   | Insertion | --        | AA       | 10     | 574851   | AAGAATGAAG  | AAAAAAAAAAA |         | <i>pol2-M644G</i> TAK206 |
| 101   | Insertion | --        | TT       | 12     | 130828   | AATCCCAGAC  | TTTTTTTTTT  |         | <i>pol2-M644G</i> TAK206 |
| 101   | Insertion | --        | TT       | 13     | 49837    | CACTTATTC   | TTTTTTTTTT  |         | <i>WT pols</i> TAK258    |
| 101   | Insertion | --        | TT       | 13     | 49837    | CACTTATTC   | TTTTTTTTTT  |         | <i>WT pols</i> TAK259    |
| 101   | Insertion | --        | TT       | 13     | 920840   | TCTTGTTCC   | TTTTTTTTTT  |         | <i>WT pols</i> TAK260    |
| 102   | Insertion | ---       | GGG      | 12     | 327626   | ATGAAAAGGT  | GGGGGGTCTA  |         | <i>pol2-M644G</i> TAK166 |
| 102   | Insertion | ---       | GGG      | 12     | 327626   | ATGAAAAGGT  | GGGGGGTCTA  |         | <i>pol2-M644G</i> TAK180 |
| 202   | Insertion | --        | CA       | 6      | 11242    | GAATGAATTT  | CACACACACA  |         | <i>pol1-L868M</i> TAK269 |
| 305   | Insertion | ---       | TAC      | 1      | 192003   | ATATTATTTT  | TACTACTACT  |         | <i>WT pols</i> TAK260    |
| N/A   | Insertion | --        | AG       | 8      | 529365   | TCAAAAAAAAA | AAAAAATTAT  |         | <i>pol2-M644G</i> TAK206 |
| N/A   | Insertion | --        | TA       | 3      | 9012     | GAAGCGAATT  | TTTTTTTTTT  |         | <i>pol1-L868M</i> TAK175 |
| N/A   | Insertion | --        | TA       | 3      | 9012     | GAAGCGAATT  | TTTTTTTTTT  |         | <i>pol1-L868M</i> TAK264 |

**Table S2. List of notable multi-base indels.** Full mutation lists may be found in (11). “Chrom.” = Chromosome number.

| Indel Type   | $\Delta$ | +   | $\Delta$ | +   | $\Delta$ | +   | $\Delta$ | +   | $\Delta$ | $\Delta$ | $\Delta$ | +   | $\Delta$ | +     |
|--------------|----------|-----|----------|-----|----------|-----|----------|-----|----------|----------|----------|-----|----------|-------|
| Repeat Class | 101      | 101 | 102      | 102 | 201      | 201 | 202      | 202 | 301      | 303      | 304      | 305 | Other    | Other |
| Indel Length | A/T      | A/T | G/C      | G/C | TA       | TA  | CA       | CA  | ATT      | ATC      | GTT      | ACT |          |       |
| 1            | 4646     | 571 | 322      | 77  |          |     |          |     |          |          |          |     |          |       |
| 2            | 276      | 8   | 1        |     | 47       | 16  | 9        | 1   |          |          |          |     | 1        | 3     |
| 3            | 25       | 1   |          | 2   |          |     |          |     | 1        | 1        | 1        | 1   |          |       |
| 4            | 3        |     |          |     |          |     | 4        |     |          |          |          |     | 1        |       |
| 5            |          |     | 2        |     |          |     |          |     |          |          |          |     |          |       |
| 6            |          |     | 1        |     |          |     |          |     |          |          |          |     |          |       |
| 7            |          |     |          |     |          |     |          |     |          |          |          |     |          |       |
| 8            |          |     |          |     | 1        |     |          |     |          |          |          |     |          |       |

**Table S3. Indel counts by repeat class and length.**

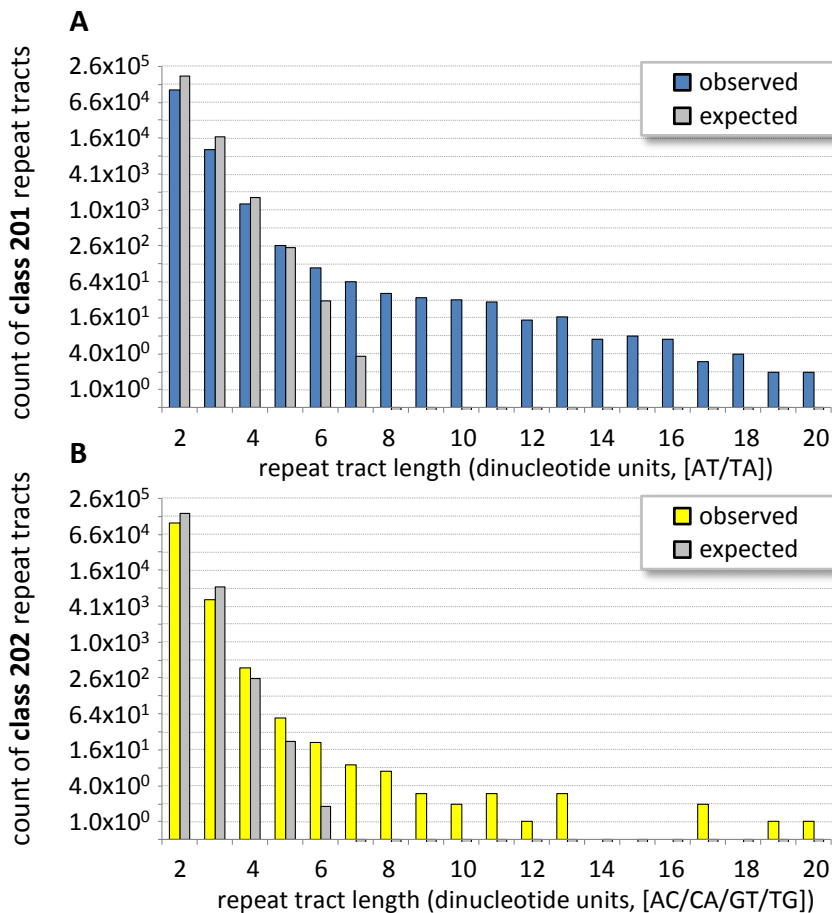

**Figure S1. Dinucleotide repeat classes and counts.** As per Figure 1 A-B, but for (A) AT/TA and (B) AC/CA/GT/TG dinucleotide repeat tracts.
